# Supplementary material for: Phenol-soluble modulin α and β display divergent roles in mice with staphylococcal septic arthritis
Source: PubMed Central journal article supplement (PMC9445034; doi:10.1038/s42003-022-03839-2), 2022-09-05
Supplement: 42003_2022_3839_MOESM3_ESM.pdf [file 42003_2022_3839_MOESM3_ESM.pdf]

## Description of Additional Supplementary Files

**File name:** Supplementary Data 1

**Description:** Sheet (1) Raw data for figure 1a: O2- production level. Sheet (2) Raw data for figure 1b: O2- production level(peak value). Sheet (3) Raw data for figure 1c: O2- production level. Sheet (4) Raw data for figure 1d: Percentage of remaining activity.

**File name:** Supplementary Data 2

**Description:** Sheet (1) Raw data for figure 2a: O2- production level. Sheet (2) Raw data for figure 2b: O2- production level(peak value). Sheet (3) Raw data for figure 2c: O2- production level(peak value).

**File name:** Supplementary Data 3

**Description:** Sheet (1) Raw data for figure 3a: O2- production level. Sheet (2) Raw data for figure 3b: O2- production level (peak value).

**File name:** Supplementary Data 4

**Description:** Sheet (1) Raw data for figure 4a: Clinical arthritis index. Sheet (2) Raw data for figure 4b: Clinical arthritis frequency. Sheet (3) Raw data for figure 4c: Clinical polyarthritis frequency. Sheet (4) Raw data for figure 4d: Weight development.

**File name:** Supplementary Data 5

**Description:** Sheet (1) Raw data for figure 5a: Bone erosion score. Sheet (2) Raw data for figure 5b: Bone erosion frequency.

**File name:** Supplementary Data 6

**Description:** Sheet (1) Raw data for figure 6a: Kidney abscess scores. Sheet (2) Raw data for figure 6b: Bacterial counts in kidneys. Sheet (3) Raw data for figure 6c: Persistence of bacterial frequency in joints.

**File name:** Supplementary Data 7

**Description:** Sheet (1) Raw data for figure 7a: ELISA data for IL-6. Sheet (2) Raw data for figure 7b: ELISA data for KC.

**File name:** Supplementary Data 8

**Description:** Sheet (1) Raw data for figure 8b-e: FACS data.
